# Supplementary material for: NiS nanorod-assembled nanoflowers grown on graphene: morphology evolution and Li-ion storage applications
Source: Royal Society of Chemistry journal article supplement (doi:10.1039/c4ta03440f), 2014-01-01

## **Supporting Information for**

### **NiS Nanorod-Assembled Nanoflower Grown on Graphene: Morphology Evolution and Li-ion Storage Application**

Hua Geng, Shao Feng Kong, Yong Wang\*

Department of Chemical Engineering, School of Environmental and Chemical Engineering,  
Shanghai University, Shangda Road 99, Shanghai, 200444, P. R. China. Email:  
[yongwang@shu.edu.cn](mailto:yongwang@shu.edu.cn)

Figure S1 shows SEM images of NiS from different precursor concentrations: (a) when the concentration of nickel chloride and thiourea is reduced by 50%, the obtained NiS nanoflowers are 0.5-1.1  $\mu\text{m}$  in size. (b) when a doubled concentration of nickel chloride is used, larger sphere sizes ( $\sim 1.3$ - $1.8 \mu\text{m}$ ) can be observed.

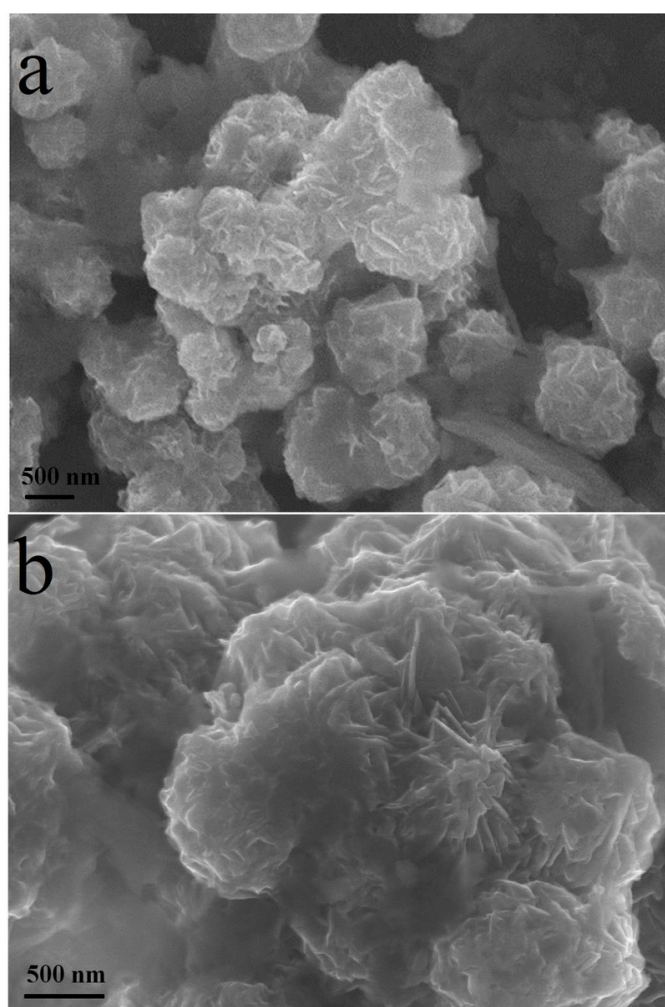

Figure S2 shows SEM and TEM images of NiS nanoparticles prepared from L-cysteine instead of thiourea.

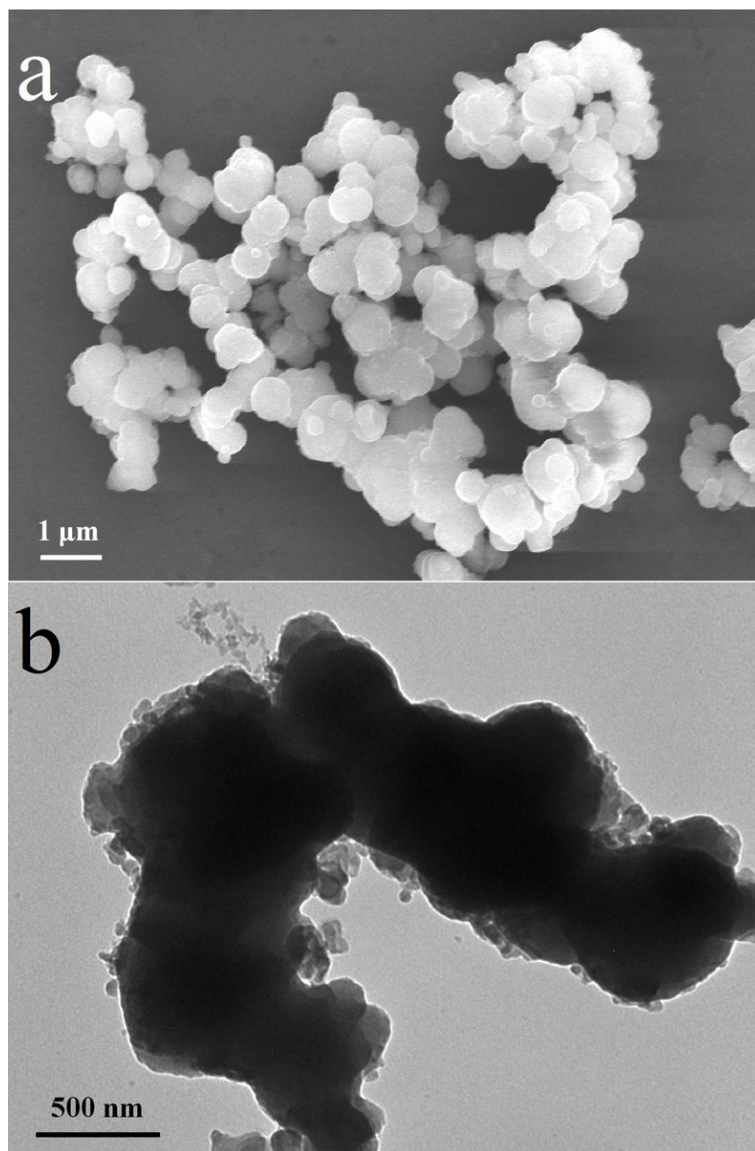

Figure S3 shows TEM images of NiS/GNS composites with different mass ratios: (a-b) NiS:GNS=4:1, (c-d) NiS:GNS=3:1, and (e-f) NiS:GNS=2:1.

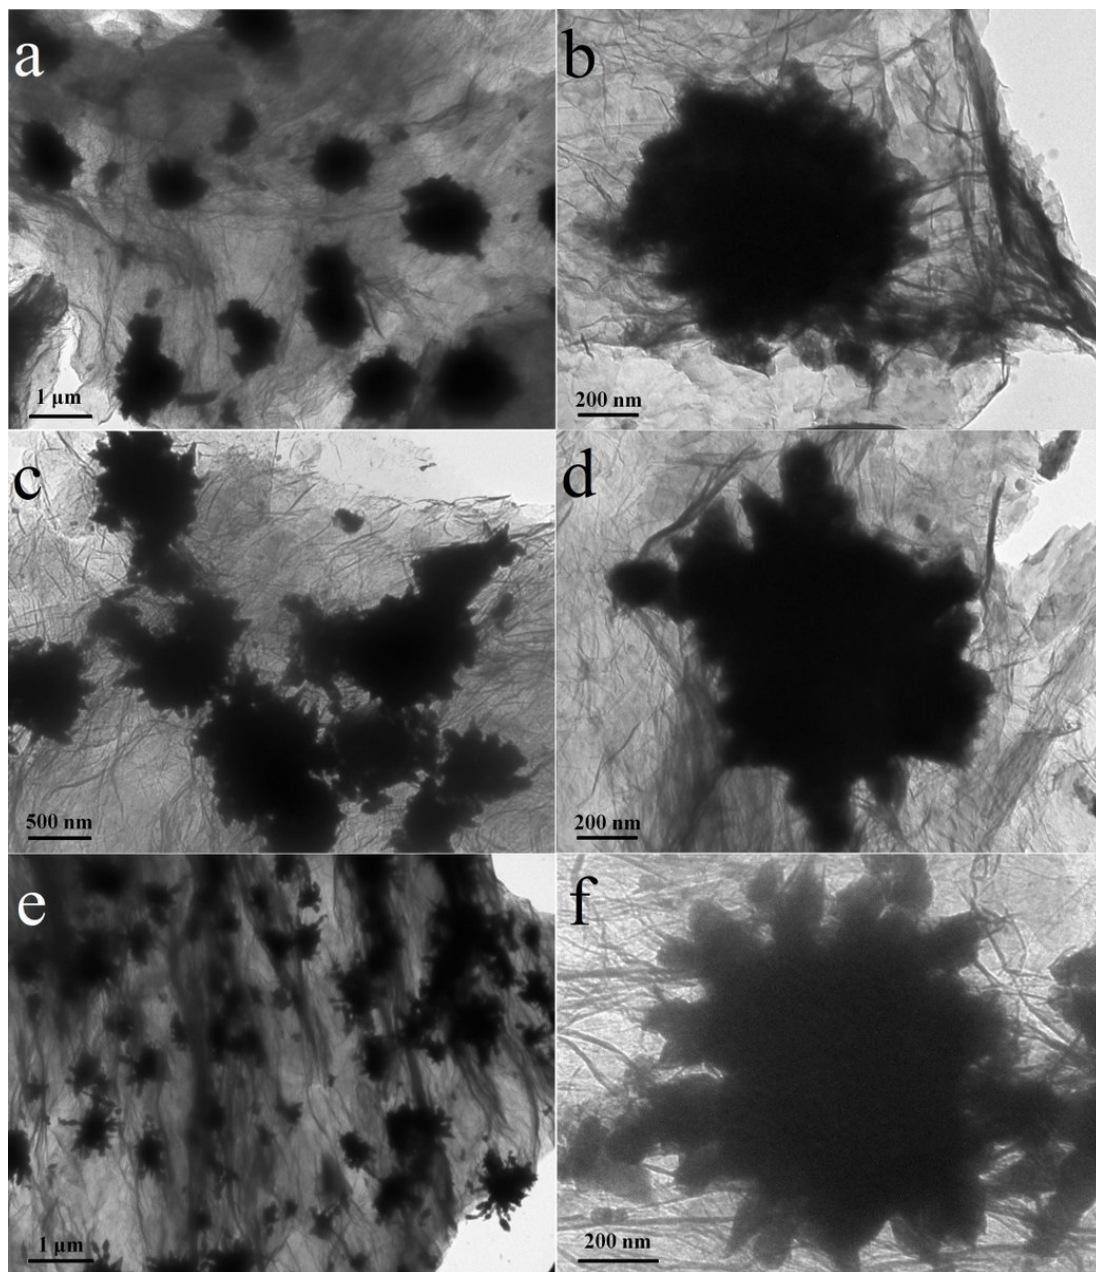

Figure S4 shows the energy dispersive spectroscopy (EDS) of NiS/GNS (1:1) composite. It is confirmed that C, Ni, and S elements are present in the composite.

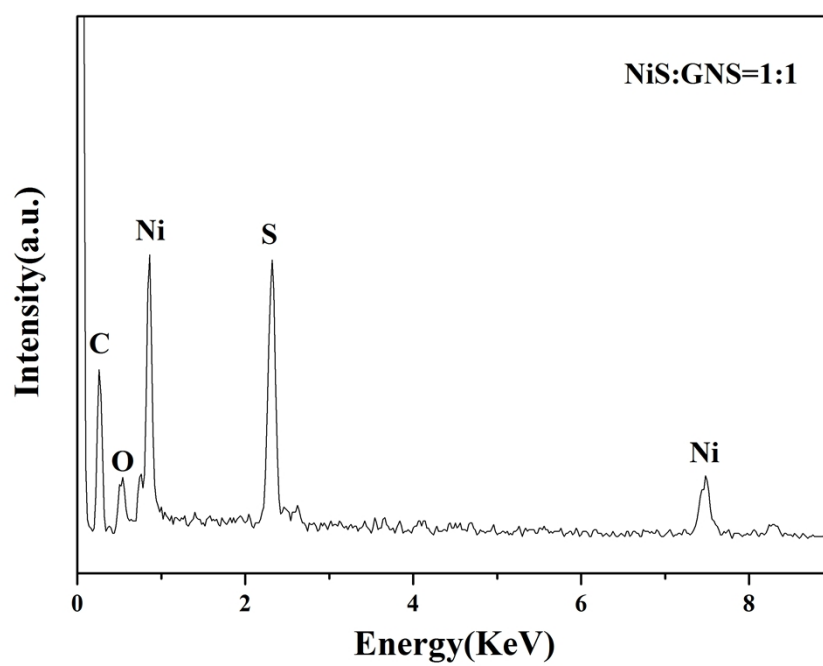

Figure S5 shows the Raman spectra of GNS and NiS-graphene composite (1:1) and Brunauer-Emmett-Teller (BET) analysis of NiS-GNS composite with the nitrogen adsorption-desorption isotherm

**a**

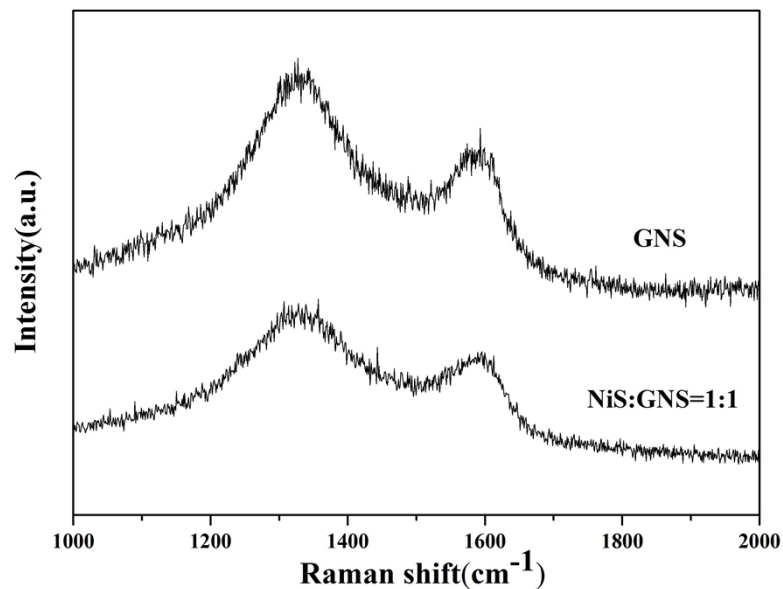

**b**

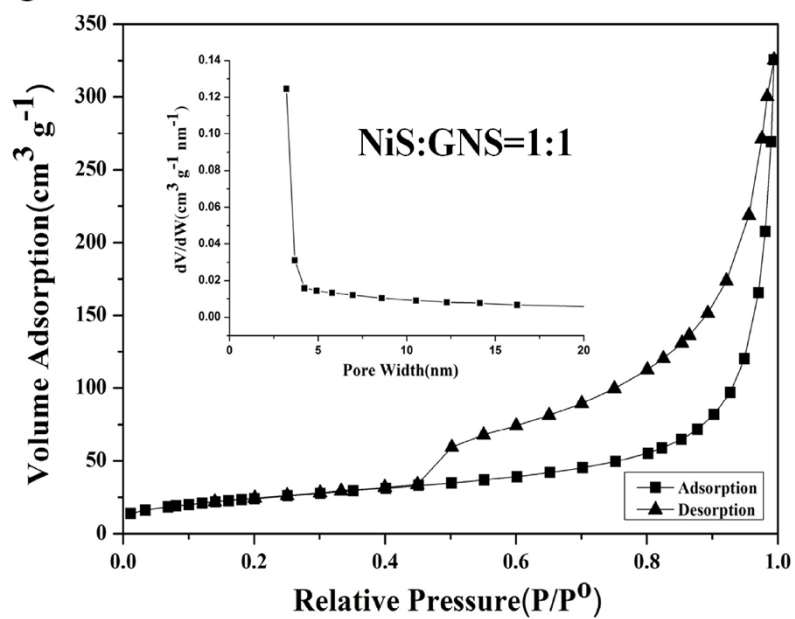

Figure S6 shows cyclic voltammetry (CV) curves of the NiS/GNS composites at a scan rate of  $0.1 \text{ mV s}^{-1}$  between 5 mV and 3 V. Two cathodic peaks ( $\sim 1.72$  and  $1.21 \text{ V}$ ) and two anodic peaks ( $2.05$  and  $2.20 \text{ V}$ ) can be identified.

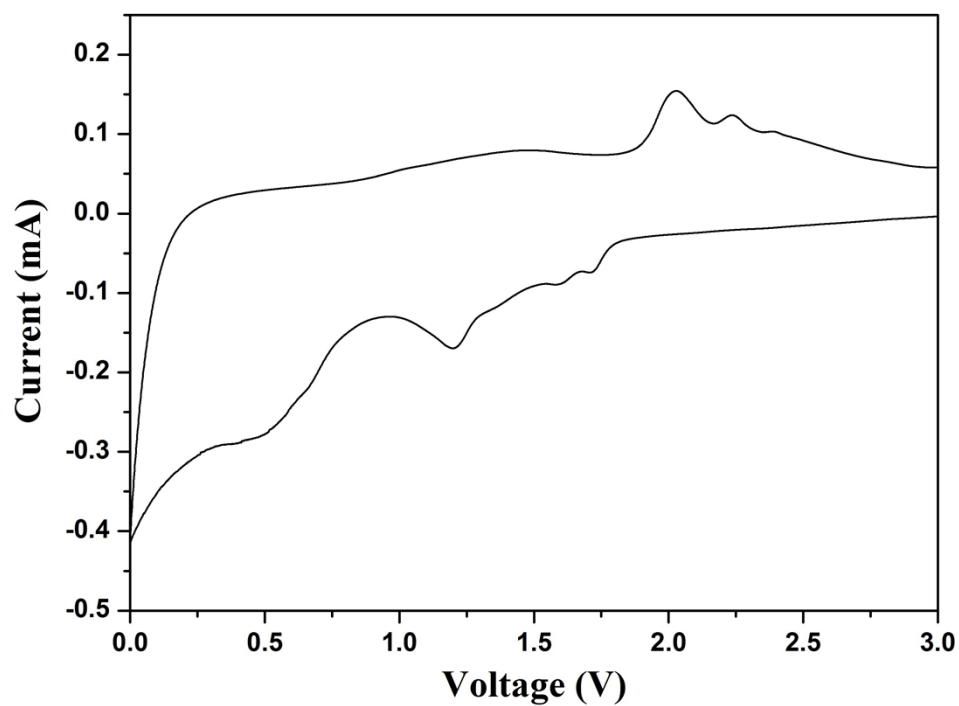

Figure S7 shows the cycling performances of NiS-GNS composite at various current rates.

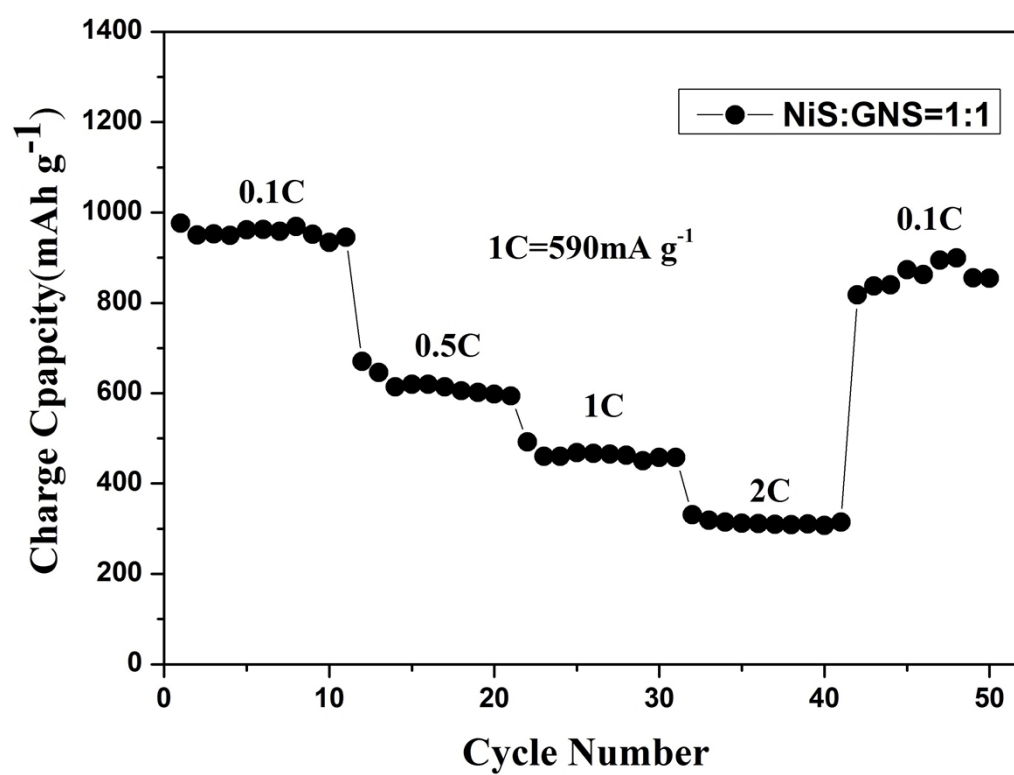



Figure S8 shows the Nyquist plots of pristine NiS and NiS/GNS after 5 cycles.

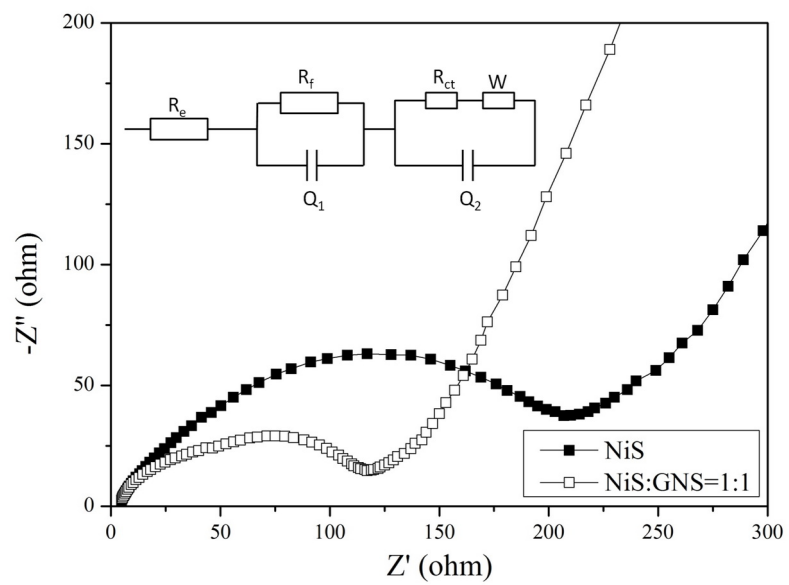

Supplement: c4ta03440f1.pdf [file c4ta03440f1.pdf]
